# Supplementary material for: The Covert World of Fish Biofluorescence: A Phylogenetically Widespread and Phenotypically Variable Phenomenon
Source: PLOS journal article supplement (doi:10.1371/journal.pone.0083259), 2014-01-08
Supplement: S3 (10.1371/journal.pone.0083259.s003) [file journal.pone.0083259.s003]

Table 2. GenBank accession numbers and sources for DNA sequences utilized in this study.

| Species                              | COI        | Glyt     | myh6     | plag2    | rag1     | zic1     |
|--------------------------------------|------------|----------|----------|----------|----------|----------|
| <i>Abalistes stellatus</i>           | JF492756   | JX190373 | JX190512 | JX190636 | JX190901 | JX191354 |
| <i>Acanthurus nigricans</i>          | EF648267   | JX190353 | JX190496 | JX190621 | JX190886 | JX191342 |
| <i>Aeoliscus strigatus</i>           | NA         | NA       | JX189647 | NA       | JX189801 | JX189030 |
| <i>Albula vulpes</i>                 | GU225131   | NA       | JX190390 | NA       | JX190803 | JX191247 |
| <i>Aldrovandia affinis</i>           | AP002974.1 | NA       | JX190392 | JX190533 | NA       | JX191249 |
| <i>Alepisaurus ferox</i>             | EU366542   | JX190305 | JX190451 | JX190577 | JX190840 | JX191299 |
| <i>Ambloplites rupestris</i>         | EU524413   | JX188709 | JQ352815 | JQ352860 | JF742888 | JQ353127 |
| <i>Ameiurus natalis</i>              | EU524425   | JX190273 | JX190416 | JX190561 | JX190818 | NA       |
| <i>Amia calva</i>                    | AB042952   | JX190245 | JX190389 | JX190531 | JX190802 | JX191246 |
| <i>Amphiprion ocellaris</i>          | NA         | NA       | NA       | NA       | AY208631 | NA       |
| <i>Anguilla rostrata</i>             | EU524441   | JX190248 | JX190395 | NA       | NA       | JX191252 |
| <i>Antennarius striatus</i>          | GU188497   | EJ582791 | JX190505 | JX190629 | JX190896 | JX191349 |
| <i>Aphredoderus sayanus</i>          | JN024806   | JX190317 | JX190462 | JX190586 | JX190850 | JX191311 |
| <i>Aplochiton taeniatus</i>          | NA         | JX190292 | JX190435 | NA       | JN232639 | NA       |
| <i>Aplodinotus grunniens</i>         | EU523923   | JX188754 | JX189695 | JX189381 | JX189853 | JX189079 |
| <i>Apogon lateralis WR</i>           | NA         | JX188705 | JX189657 | JX189339 | JX189811 | JX189040 |
| <i>Aracana aurita</i>                | JQ861007   | JX190372 | JX190511 | JX190635 | JX190900 | JX191353 |
| <i>Archoplites interruptus</i>       | JN024809   | JX190346 | JQ352816 | JQ352861 | JF742889 | JQ353128 |
| <i>Argentina silus</i>               | NA         | JX190279 | JX190423 | NA       | JX190822 | JX191275 |
| <i>Argyropelecus gigas</i>           | EU148084   | NA       | JX190448 | JX190574 | JX190837 | JX191296 |
| <i>Arrhamphus sclerolepis</i>        | NA         | NA       | JX189640 | JX189324 | NA       | JX189025 |
| <i>Assurger anzac</i>                | JN990845   | JX190381 | JX190521 | JX190644 | JX190910 | JX191364 |
| <i>Astyanax mexicanus</i>            | HQ557152   | JX190268 | JX190411 | JX190556 | NA       | NA       |
| <i>Ateleopus japonicus</i>           | AP002916   | JX190303 | JX190449 | JX190575 | JX190838 | JX191297 |
| <i>Aulostomus maculatus</i>          | JQ842017   | JX188694 | JX189646 | JX189329 | JX189800 | JX189029 |
| <i>Barbourisia rufa</i>              | JQ354000   | JX190324 | JX190468 | JX190591 | JX190855 | JX191314 |
| <i>Bathylaco nigricans</i>           | AP009494   | JX190277 | JX190421 | NA       | NA       | NA       |
| <i>Bathylagus eurypops</i>           | NA         | JX190280 | JX190424 | NA       | NA       | JX191276 |
| <i>Bathypterois arcticolor</i>       | NA         | JX190307 | JX190453 | JX190579 | JX190842 | JX191300 |
| <i>Bathysaurus ferox</i>             | EU366547   | NA       | NA       | EU366643 | EU366689 | EU366734 |
| <i>Benthalbella macropinna</i>       | EU366552   | NA       | NA       | EU366648 | EU366694 | EU366739 |
| <i>Benthoosema glaciale</i>          | KF768167   | NA       | NA       | NA       | KF768155 | KF768160 |
| <i>Beryx decadactylus</i>            | JF492956   | JX188692 | JX189644 | JX189327 | JX189798 | NA       |
| <i>Betta splendens</i>               | JQ867506   | JX188827 | JX189768 | NA       | JX189928 | JX189154 |
| <i>Bothus lunatus</i>                | JQ842025   | JX190361 | JX190501 | NA       | JX190891 | NA       |
| <i>Brotula multibarata</i>           | QK431501   | JX188680 | JX189630 | JX189315 | JX189782 | JX189013 |
| <i>Callichelys catostoma</i>         | KF768168   | NA       | NA       | NA       | NA       | NA       |
| <i>Callionymus bairdi</i>            | JQ840435   | JX190380 | JX190518 | JX190642 | JX190908 | JX191361 |
| <i>Cantherhines pullus</i>           | JQ841489   | JX190377 | JX190515 | NA       | JX190904 | JX191357 |
| <i>Caranx crysos</i>                 | GU702378   | JX190345 | JX190490 | JX190615 | JX190879 | JX191336 |
| <i>Cataetyx lepidogenys</i>          | NA         | JX190337 | JX190481 | JX190604 | JX190868 | JX191326 |
| <i>Centroberyx druzhinini</i>        | HQ945941   | JX190329 | JX190473 | JX190596 | JX190860 | JX191319 |
| <i>Centropomus undecimalis</i>       | JQ365276   | JX188711 | JX189662 | JX189344 | JX189816 | JX189045 |
| <i>Centropyge flavissima</i>         | JQ431559   | NA       | NA       | NA       | EF530089 | NA       |
| <i>Cephalopholis argus</i>           | JX674947   | JX188757 | JX189698 | JX189384 | JX189856 | JX189082 |
| <i>Chaetodon striatus</i>            | HQ840451   | JX190349 | JX190492 | JX190617 | JX190882 | JX191338 |
| <i>Chanos chanos</i>                 | HQ654700   | JX190263 | JX190408 | JX190551 | JX190809 | JX191264 |
| <i>Chauxna suttkusi</i>              | NA         | JX190368 | JX190507 | JX190631 | JX190898 | JX191351 |
| <i>Chelmon rostratus</i>             | FJ583134   | JX190350 | JX190493 | JX190618 | JX190883 | JX191339 |
| <i>Chilomycterus schoepfi</i>        | JQ842420   | JX188832 | JX189773 | JX189454 | JX189933 | JX189158 |
| <i>Chitala chitala</i>               | FJ918897   | JX190259 | JX190405 | JX190546 | FJ896406 | JX191260 |
| <i>Chlorophthalmus agassizii</i>     | EU366553   | NA       | NA       | NA       | EU366695 | EU366740 |
| <i>Chologaster cornuta</i>           | HQ557553   | JX190318 | HQ729508 | HQ729624 | HQ707706 | HQ729595 |
| <i>Chromis cyanea</i>                | JQ840457   | JX188795 | NA       | JX189416 | JX189896 | JX189123 |
| <i>Cirrhichthys falco</i>            | EJ583255   | NA       | JQ352824 | JQ352869 | NA       | JQ353136 |
| <i>Conger oceanicus</i>              | NA         | JX190249 | JX190396 | JX190537 | NA       | JX191253 |
| <i>Coregonus hippocarpius</i>        | EU523959   | JX190297 | JX190441 | JX190568 | JX190831 | JX191289 |
| <i>Coryphaena hippurus</i>           | JQ839745   | JX190342 | JX190488 | JX190612 | JX190876 | JX191333 |
| <i>Coryphaenoides rupestris</i>      | NA         | EU002054 | EU001915 | NA       | FJ215233 | NA       |
| <i>Cottus caroliniae</i>             | JN025051   | JX188700 | JX189652 | JX189334 | JX189806 | JX189035 |
| <i>Cromeria nilotica</i>             | AP007275   | JX190265 | JX190410 | JX190553 | JX190811 | JX191266 |
| <i>Cyttopsis rosea</i>               | JQ774524   | JX190321 | JX190465 | JX190588 | JX190852 | NA       |
| <i>Denticipes clupeioides</i>        | AP007276   | NA       | JX190407 | JX190549 | DQ912100 | NA       |
| <i>Diaphus dumerilii</i>             | KF768169   | NA       | NA       | NA       | KF768156 | KF768161 |
| <i>Diodon holocanthus</i>            | GU225199   | JX188833 | JX189774 | JX189455 | JX189934 | JX189159 |
| <i>Diplophos taenia</i>              | EU366584   | NA       | FJ918866 | EU366676 | EU366724 | EU366768 |
| <i>Dissostichus eleginoides</i>      | JN640627   | JX188801 | JN187040 | JX189422 | JX189902 | JN186822 |
| <i>Echeneis naucrates</i>            | JQ841117   | JX190343 | NA       | JX190613 | JX190877 | JX191334 |
| <i>Echidna rhodochilus</i>           | NA         | JX190251 | JX190397 | JX190538 | JX190805 | NA       |
| <i>Elassoma zonatum</i>              | JN025308   | JX190386 | JQ352848 | JQ352893 | JQ353047 | JQ353156 |
| <i>Eleotris pisonis</i>              | AY722157   | JX188817 | JX189758 | JX189440 | JX189918 | JX189145 |
| <i>Elops saurus</i>                  | AP004807   | JX190247 | JX190394 | JX190535 | FJ896408 | JX191250 |
| <i>Enneapterygius gruschkai</i>      | HQ168540   | NA       | NA       | NA       | HQ168770 | NA       |
| <i>Esox lucius</i>                   | EU524591   | JX190284 | JX190428 | EU002099 | JX190825 | EU001870 |
| <i>Etheostoma atripinne</i>          | HQ557533   | JX188739 | NA       | JX189366 | JX189838 | JX189065 |
| <i>Eurypharynx pelicanoides</i>      | AB046473   | JX190254 | JX190402 | NA       | NA       | JX191255 |
| <i>Facciolella gilbertii</i>         | KF768170   | NA       | NA       | NA       | NA       | KF768162 |
| <i>Fistularia petimba</i>            | JQ365356   | NA       | JX190482 | JX190607 | JX190871 | NA       |
| <i>Forcipiger flavissimus</i>        | JF434972   | JX188713 | JX189664 | JX189346 | JX189818 | JX189047 |
| <i>Galaxias maculatus</i>            | AP004104   | JX190294 | JX190437 | NA       | NJ232643 | JX191286 |
| <i>Galaxiella nigrostriata</i>       | AP006853   | JX190295 | JX190438 | NA       | NJ232647 | JX191287 |
| <i>Gambusia affinis</i>              | JQ842475   | JX188691 | JX189643 | JX189326 | JX189797 | JX189027 |
| <i>Gasterosteus aculeatus</i>        | JQ354102   | JX188696 | JX189649 | JX189331 | JX189803 | JX189032 |
| <i>Gazza minuta</i>                  | DQ028007   | JX188724 | JX189671 | JX189353 | JX189825 | JX189054 |
| <i>Gephyroberyx darwini</i>          | HQ945918   | JX190334 | JX190478 | JX190601 | JX190865 | JX191324 |
| <i>Gigantura indica</i>              | EU366557   | NA       | NA       | EU366652 | EU366699 | EU366744 |
| <i>Gnathonemus petersii</i>          | HM880237   | JX190258 | NA       | JX190545 | JX190807 | JX191259 |
| <i>Gonrynychus greyi</i>             | AB054134   | JX190264 | JX190409 | JX190552 | JX190810 | JX191265 |
| <i>Gymnorhamphichthys petiti</i>     | NA         | JX190267 | NA       | JX190555 | JX190813 | JX191268 |
| <i>Halictheres bivittatus</i>        | JQ840524   | JX188785 | JX189728 | JX189410 | JX189885 | JX189111 |
| <i>Haliuethichthys aculeatus</i>     | NA         | JX190370 | JX190509 | JX190633 | NA       | NA       |
| <i>Halosaurus macrochir</i>          | EU869816   | JX190246 | JX190393 | JX190534 | NA       | NA       |
| <i>Harpadon marchohir</i>            | EU366558   | NA       | NA       | EU366653 | EU366700 | EU366745 |
| <i>Helostoma temminckii</i>          | NA         | JX190384 | JX190524 | JX190647 | JX190913 | JX191366 |
| <i>Heteroconger hassi</i>            | JQ350055   | JX190250 | NA       | NA       | NA       | JX191254 |
| <i>Heteromycteris japonicus</i>      | ABFJ254    | JX190365 | JX190504 | JX190628 | JX190895 | JX191348 |
| <i>Himantolophus sagamius</i>        | GU440342   | JX190369 | JX190508 | JX190632 | JX190899 | JX191352 |
| <i>Hime japonica</i>                 | AB047821   | NA       | NA       | EU366641 | EU366687 | EU366732 |
| <i>Hiodon tergisus</i>               | EU524659   | JX190257 | JX190404 | JX190544 | NA       | JX191258 |
| <i>Histiophryne cryptacantus</i>     | GU188513   | JX190367 | JX190506 | JX190630 | JX190897 | JX191350 |
| <i>Hoplostethus atlanticus</i>       | JN580187   | JX188693 | JX189645 | JX189328 | JX189799 | JX189028 |
| <i>Hypopitychus dybowskii</i>        | NC4400     | JX190341 | JX190487 | JX190611 | JX190875 | JX191332 |
| <i>Ijimaia loppei</i>                | NA         | JX190304 | JX190450 | JX190576 | JX190839 | JX191298 |
| <i>Ipnops sp</i>                     | EU366560   | NA       | NA       | EU366655 | EU366702 | EU366747 |
| <i>Kurtus gulliveri</i>              | EU381031   | JX190339 | JX190485 | JX190609 | JX190873 | JX191330 |
| <i>Labrisomus multiporosus</i>       | NA         | JX188812 | JX189752 | JX189434 | JX189914 | JX189139 |
| <i>Lachnolaimus maximus</i>          | JQ841240   | JX188788 | JX189732 | JX189411 | NA       | JX189115 |
| <i>Lactophrys triqueter</i>          | JQ861018   | JX188835 | JX189776 | JX189457 | JX189936 | JX189161 |
| <i>Lampris guttatus</i>              | DQ885096   | JX190314 | NA       | JX190584 | JX190848 | JX191308 |
| <i>Lates niloticus</i>               | GU324190   | JX190382 | JX190522 | JX190645 | JX190911 | NA       |
| <i>Leiognathus equulus</i>           | DQ028017   | JX188725 | JX189672 | JX189354 | JX189826 | JX189055 |
| <i>Lepidogalaxias salamandroides</i> | FJ918925   | NA       | JX190440 | NA       | FJ896438 | JX191288 |
| <i>Lepidogobius lepidus</i>          | NA         | NA       | JX190519 | JX190643 | JX190909 | JX191362 |
| <i>Lepomis macrochirus</i>           | EU524741   | JX190347 | JX190491 | JX190616 | JX190880 | JX191337 |
| <i>Liopropoma rubre</i>              | JQ841244   | NA       | HQ731360 | HQ731341 | HQ731318 | HQ731389 |
| <i>Liparis mucosus</i>               | JQ354182   | JX190387 | JX190525 | NA       | JX190915 | JX191368 |
| <i>Lophius americanus</i>            | EU660715   | JX188679 | JX189629 | JX189314 | JX189781 | JX189012 |
| <i>Lota lota</i>                     | HQ961084   | JX190320 | JX190464 | NA       | JX190851 | JX191313 |
| <i>Luvarus imperialis</i>            | AP009161   | JX190355 | EF536299 | EF536261 | EF530099 | EF533922 |
| <i>Lycodes terraenovae</i>           | NA         | EF032996 | EF032931 | EF033022 | NA       | EF032918 |
| <i>Maccullochella peellii</i>        | DQ107940   | JX188737 | JQ352837 | JQ352882 | JQ353036 | JQ353148 |
| <i>Macropinna microstoma</i>         | EU869816   | JX190282 | JX190426 | NA       | JX190823 | JX191278 |
| <i>Macroramphosus scolopax</i>       | JQ775070   | NA       | JX190483 | JX190608 | JX190872 | JX191329 |
| <i>Mallotus villosus</i>             | HQ712650   | JX190289 | FJ918856 | NA       | DQ397097 | FJ906654 |
| <i>Masturus lanceolatus</i>          | AP006239   | JX190374 | EF536316 | EF536277 | AY308792 | EF533939 |
| <i>Megalops atlanticus</i>           | AP004808   | NA       | NA       | JX190536 | AY430204 | JX191251 |
| <i>Meiacanthus grammistes</i>        | NA         | JX188809 | JX189748 | JX189430 | JX189910 | JX189135 |
| <i>Melamphaes polyplepis</i>         | NA         | JX190325 | JX190469 | JX190592 | JX190856 | JX191315 |
| <i>Mene maculata</i>                 | HQ805056   | JX190352 | JX190495 | JX190620 | JX190885 | JX191341 |
| <i>Micropterus salmoides</i>         | GU557266   | JX190348 | JQ352819 | JQ352864 | JF742912 | JQ353131 |
| <i>Mola mola</i>                     | JX438518   | JX190375 | JX190513 | JX190637 | JX190902 | JX191355 |
| <i>Monocentris japonica</i>          | DQ648452   | JX190332 | JX190476 | JX190599 | JX190863 | JX191322 |
| <i>Monopterus albus</i>              | AP002945   | JX188698 | JQ352812 | JQ352857 | JQ353018 | JQ353124 |
| <i>Monotaxis grandoculis</i>         | JQ431907   | JX188727 | JX189673 | JX189356 | JX189828 | JX189057 |
| <i>Morone chrysops</i>               | EU524141   | JX188732 | JX189678 | JX189361 | JX189833 | JX189061 |
| <i>Muraenichthys</i>                 | JQ431927   | NA       | NA       | NA       | NA       | NA       |
| <i>Myrichthys maculosus</i>          | NA         | JX190252 | JX190399 | JX190539 | NA       | NA       |
| <i>Myripristis violacea</i>          | HM034239   | JX190330 | JX190474 | JX190597 | JX190861 | JX191320 |
| <i>Nansenia ardesiaca</i>            | AP004106   | JX190281 | JX190425 | NA       | NA       | JX191277 |
| <i>Naso lituratus</i>                | HM034244   | JX190354 | EF536292 | EF536254 | EF530092 | EF533915 |
| <i>Neochanna burrowsius</i>          | NA         | JX190296 | JX190439 | NA       | JN232658 | NA       |
| <i>Neonesthes capensis</i>           | KF768171   | JX190301 | JX190445 | JX190572 | NA       | JX191293 |
| <i>Neosalanx jordani</i>             | HM151574   | HQ916019 | NA       | NA       | HQ916058 | HQ916188 |
